# Supplementary material for: Chemical fingerprinting and quantitative constituent analysis of Siwu decoction categorized formulae by UPLC-QTOF/MS/MS and HPLC-DAD
Source: PubMed Central journal article supplement (PMC3602048; doi:10.1186/1749-8546-8-5), 2013-03-01

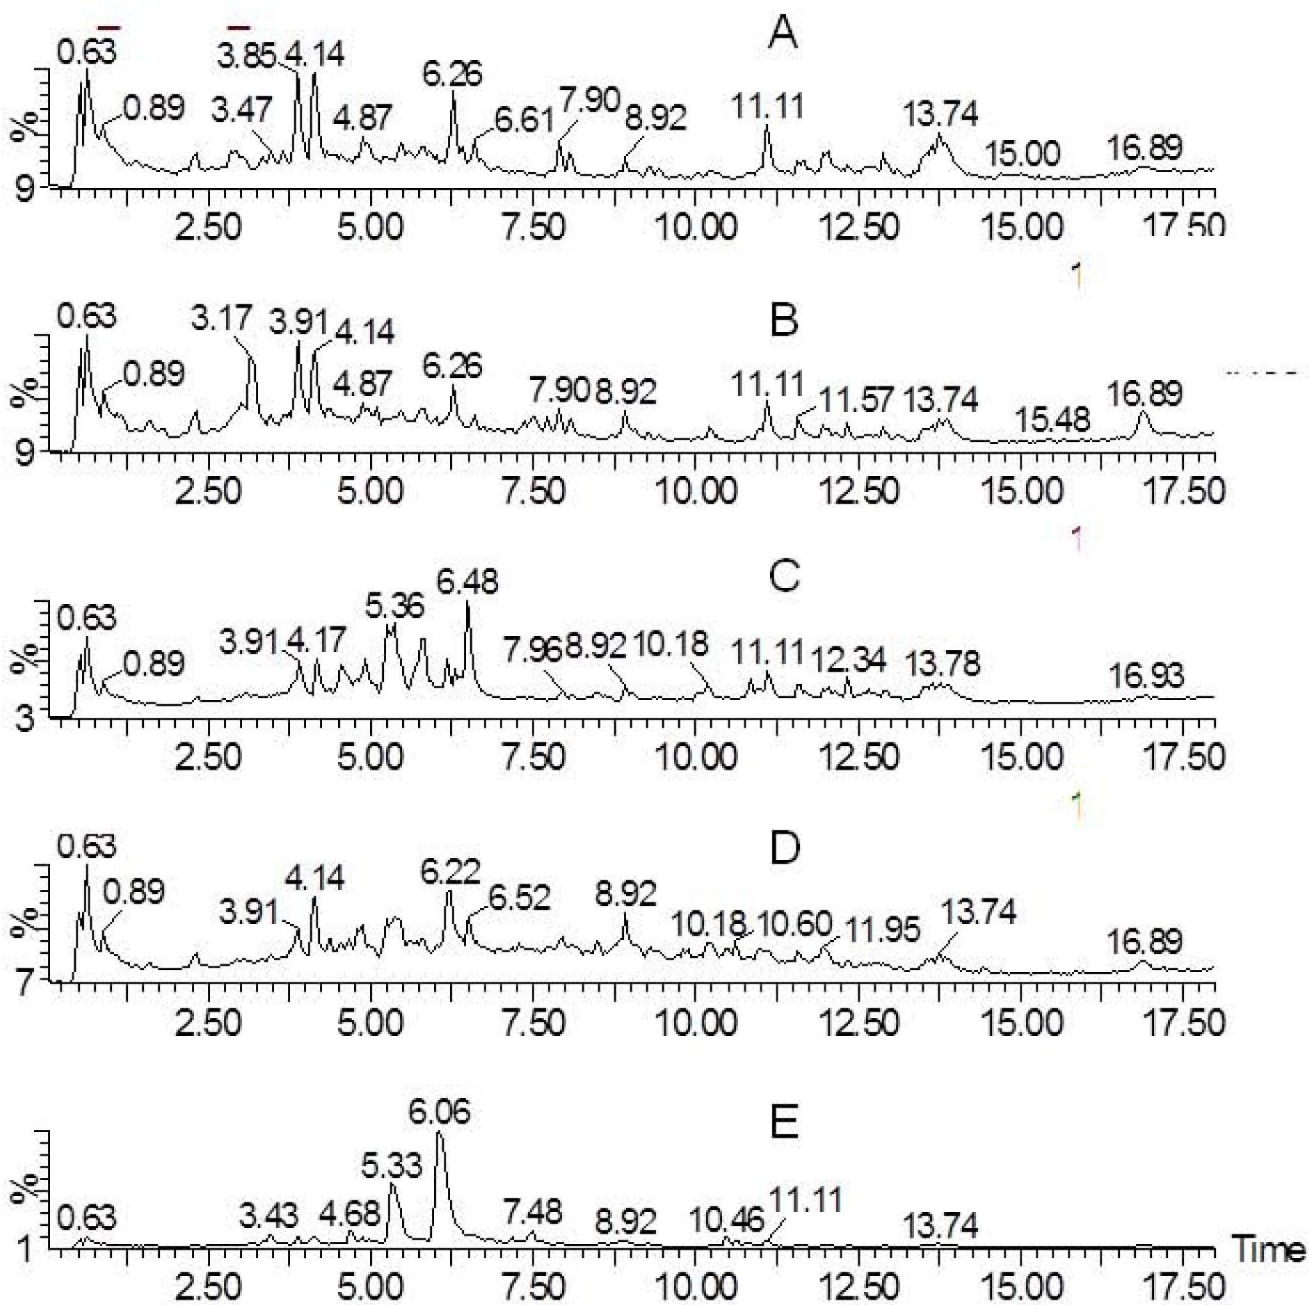

A: SWD, B: THSWD, C: XFSWD, D: SFZYD, E: QLSWD

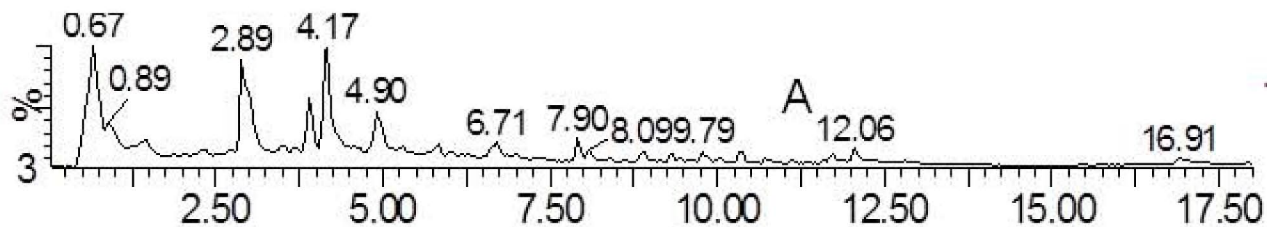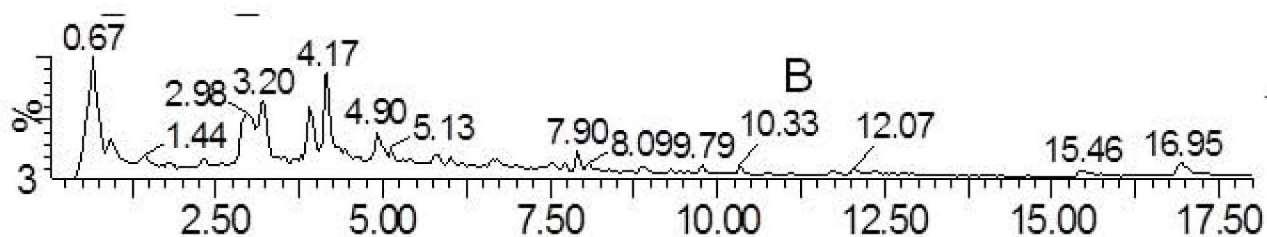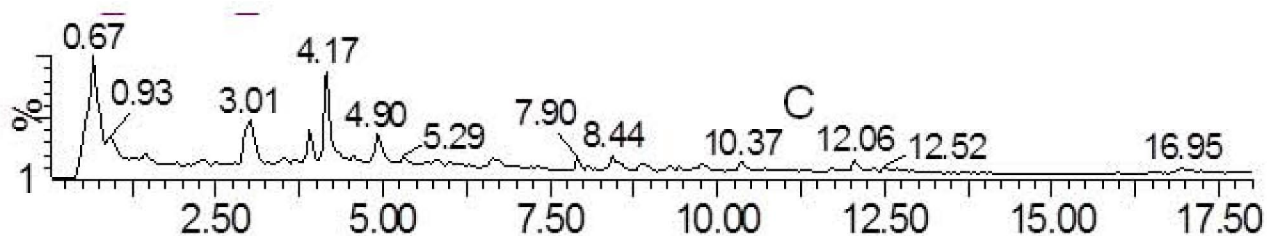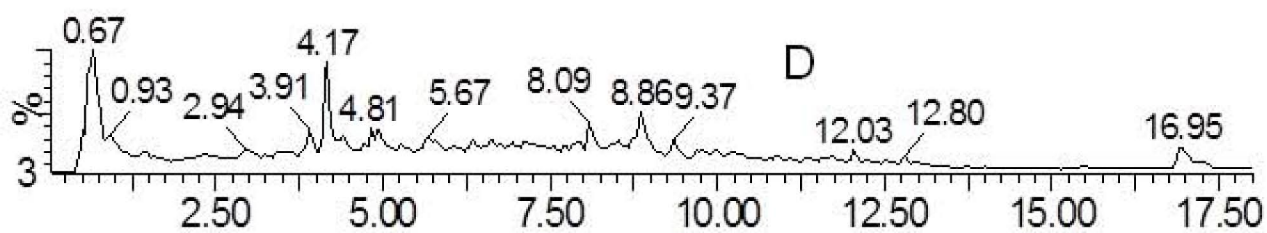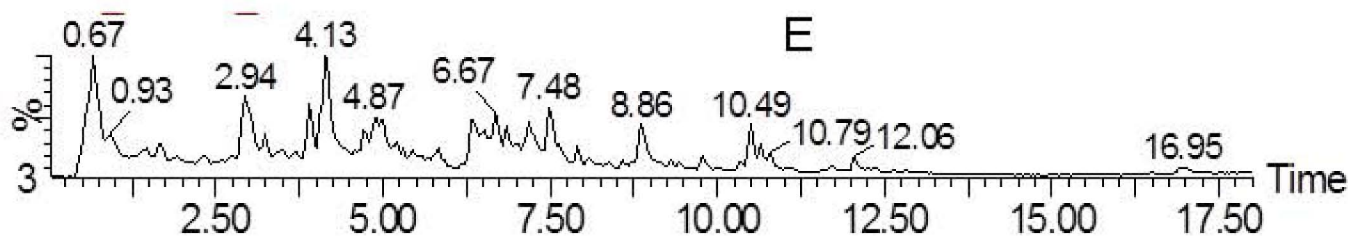

A: SWD, B: THSWD, C: XFSWD, D: SFZYD, E: QLSWD

# Scores Comp[1] vs. Comp[2]

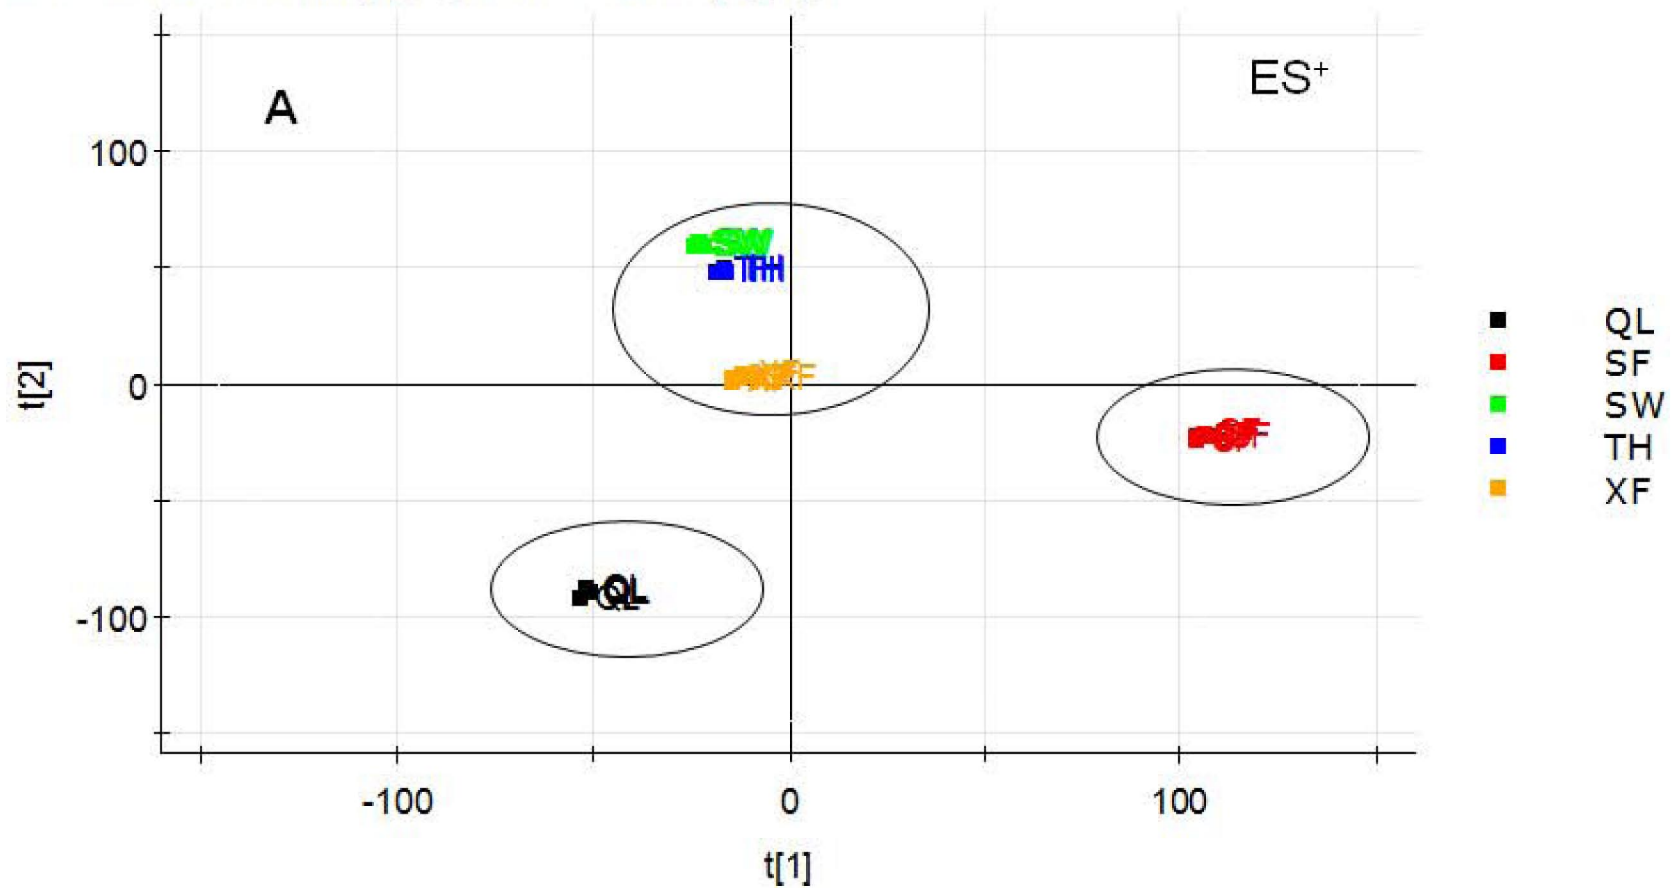

# Scores Comp[1] vs. Comp[2]

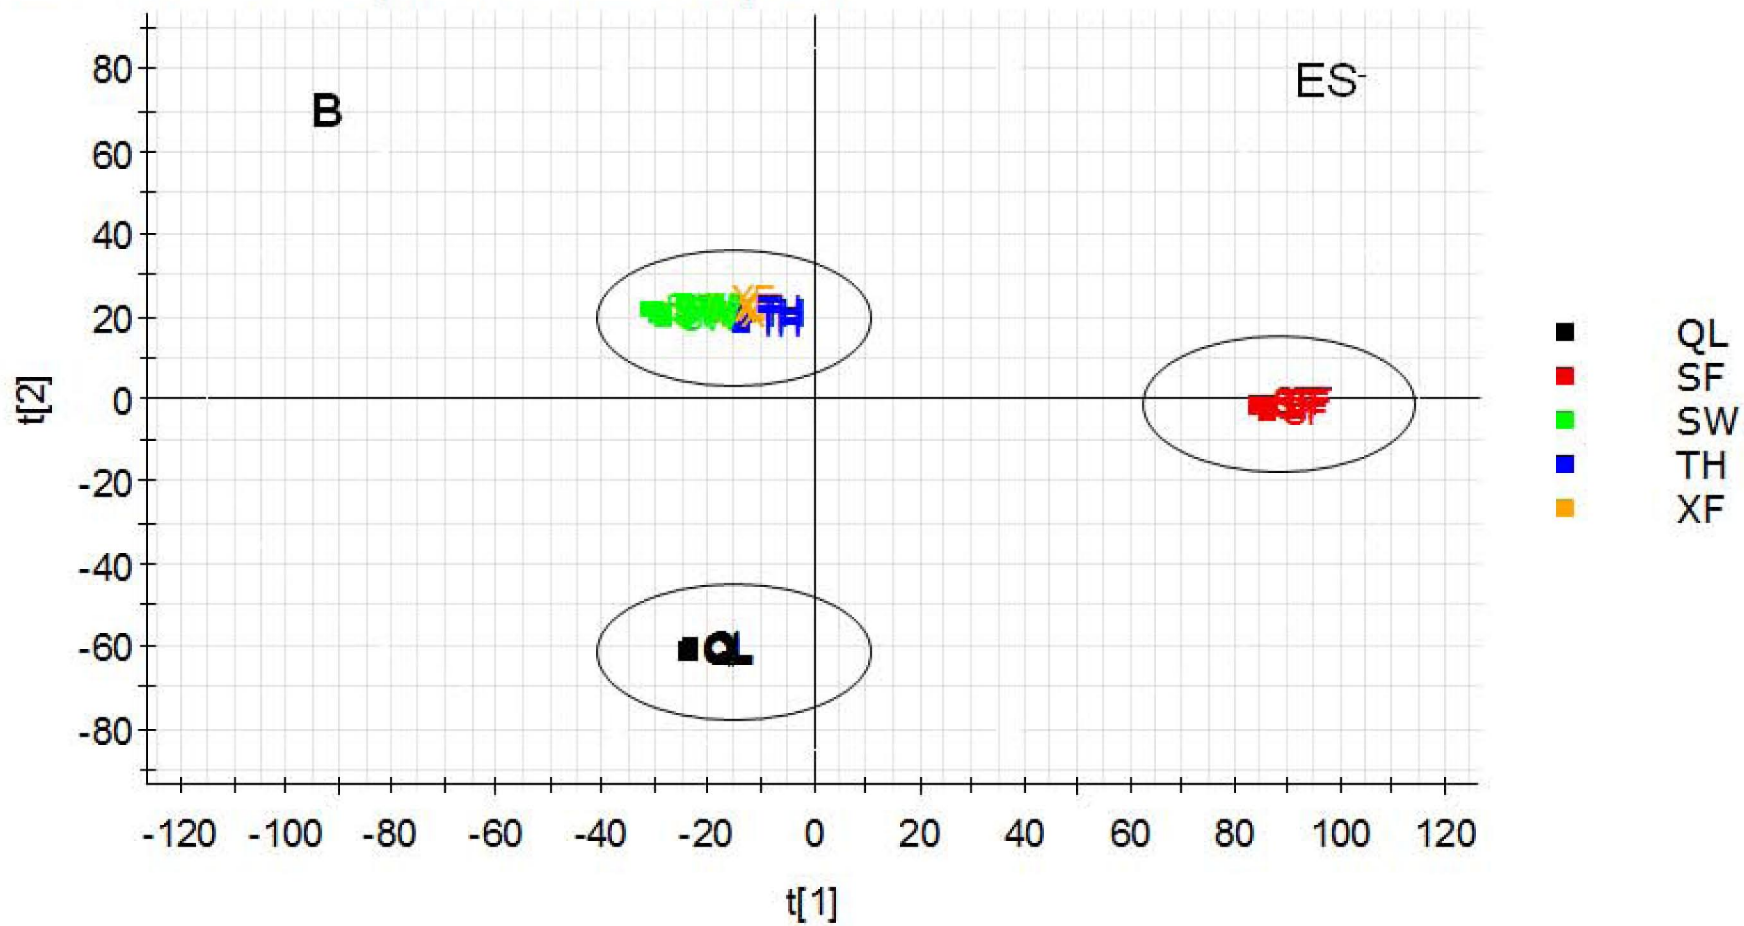

Supplement: 1749-8546-8-5-S1.pdf [file 1749-8546-8-5-S1.pdf]
